# Supplementary material for: Spiro-fused carbohydrate oxazoline ligands: Synthesis and application as enantio-discrimination agents in asymmetric allylic alkylation
Source: publisher site journal article supplement (doi:10.3762/bjoc.12.18), 2016-01-29

## **Supporting Information**

for

### **Spiro-fused carbohydrate oxazoline ligands: Synthesis and application as enantio-discrimination agents in asymmetric allylic alkylation**

Jochen Kraft<sup>1</sup>, Martin Golkowski<sup>2</sup> and Thomas Ziegler\*<sup>1</sup>

Address: <sup>1</sup>Institute of Organic Chemistry, University of Tuebingen, Auf der Morgenstelle 18, 72076 Tuebingen, Germany and <sup>2</sup>Department of Pharmacology, University of Washington, 1959 NE Pacific St, Box 357280, Seattle, WA 98195, USA

Email: Thomas Ziegler\* - [thomas.ziegler@uni-tuebingen.de](mailto:thomas.ziegler@uni-tuebingen.de)

\*Corresponding author

**Experimental procedures, analytical data and copies of NMR spectra**

## **Content**

|                         |         |
|-------------------------|---------|
| Experimental procedures | S3–S12  |
| References              | S13     |
| NMR spectra             | S14–S20 |

## Experimental procedures

### General remarks

All solvents were dried according to standard methods, distilled and stored over molecular sieves 3 Å under an atmosphere of nitrogen prior to their use. Petroleum ether (PE) refers to the fraction boiling in the range 60–90 °C. All non-aqueous reactions were performed in oven-dried glassware under an atmosphere of N<sub>2</sub> unless stated otherwise. NMR spectra were recorded on a Bruker Avance 400 spectrometer and were calibrated for the respective solvent signal (<sup>1</sup>H-CDCl<sub>3</sub>: 7.26 ppm; <sup>13</sup>C-CDCl<sub>3</sub>: 77.16 ppm). NMR signals were numbered in accordance with carbohydrate nomenclature for the names of the compounds. ESI-HRMS were measured on a Bruker Daltonics MAXIS 4G spectrometer. ESI-spectra were recorded on a Bruker Esquire 3000 Plus spectrometer. Elemental analyses were performed on a HEKAtech Euro 3000 CHN analyzer. IR spectra were recorded on a Bruker Tensor 27 spectrometer. Optical rotations were measured with a Perkin-Elmer Polarimeter 341 in a 10 cm cuvette at 20 °C. Melting points were determined with a Büchi Melting Point M-560 apparatus. Reactions were monitored by TLC on Polygram Sil G/UV silica gel plates from Machery&Nagel. Detection of spots was effected by charring with H<sub>2</sub>SO<sub>4</sub> (5% in EtOH), staining by spraying the plates with an alkaline aqueous solution of potassium permanganate or by inspection of the TLC plates under UV light. Preparative chromatography was performed on silica gel (0.032–0.063 mm) from Machery&Nagel with different mixtures of solvents as eluent. The enantiomeric excess of **14** was determined by chiral HPLC on a Sykam S 1121 HPLC system equipped with a Reprosil Chiral-NR column (*n*-hexane:2-propanol, 90:10; flow rate 1.6 mL/min): *t*<sub>R</sub> = 6.8 min for (*R*)-**14**, *t*<sub>R</sub> = 8.6 min for (*S*)-**14**. All yields are isolated yields determined after purification of the product either by silica gel column chromatography or crystallization and were not optimized unless noted otherwise.

### 3,4,5-Tri-*O*-benzyl-D-fructopyranose (**3**)

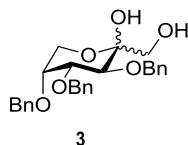

3,4,5-Tri-*O*-benzyl-1,2-*O*-isopropylidene-D-fructopyranose (**1**) [1] (0.94 g, 1.91 mmol) was dissolved in 50% aqueous acetic acid (20 mL), and the solution was refluxed for 3 h. After cooling the solution to room temperature, the resulting suspension was evaporated in vacuo and coevaporated with toluene. Chromatography of the residue (PE:EtOAc, 1:1) afforded **3** (0.83 g, 96%) as colorless oil. Spectroscopic data were in accordance with the literature [2].

### 3,4,5-Tri-*O*-benzyl-D-psicopyranose (**4**)

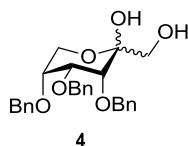

A suspension of 3,4,5-tri-*O*-benzyl-1,2-*O*-isopropylidene-D-psicopyranose (**2**) [3] (0.98 g, 2.00 mmol) in 50% aqueous acetic acid (20 mL) was refluxed for 3 h. The reaction mixture was cooled to room temperature concentrated in vacuo and coevaporated with toluene. Chromatography of the residue (PE:EtOAc, 2:1) and crystallization from *n*-hexane/EtOAc afforded **4** (0.70 g, 78%) as colorless needles. Mp 101 °C (*n*-hexane/EtOAc).  $R_f$  = 0.40 (PE:EtOAc, 1:1).  $^1\text{H}$  NMR ( $\text{CDCl}_3$ ):  $\delta$  7.40-7.30 (m, 15H, phenyl-H), 5.71 (bs, 1H, OH), 4.92 (d,  $J$  = 11.5 Hz, 1H,  $\text{OCH}_2\text{Ph}$ ), 4.78 (d,  $J$  = 11.5 Hz, 1H,  $\text{OCH}_2\text{Ph}$ ), 4.60-4.52 (m, 4H,  $\text{OCH}_2\text{Ph}$ ), 4.29 (bs, 1H, H-5), 4.06 (t,  $J$  = 11.0 Hz, 1H, H-6a), 3.77-3.69 (m, 2H, H-1a, H-6b), 3.51-3.45 (m, 3H, H-1b, H-3, H-4), 1.76 (bs, 1H, OH).  $^{13}\text{C}$  NMR ( $\text{CDCl}_3$ ):  $\delta$  138.0, 137.8, 137.7, 128.7, 128.7, 128.6, 128.3, 128.2, 128.1, 128.1, 127.6 (C-Ar), 97.8 (C-2), 75.7 (C-5), 75.3 ( $\text{OCH}_2\text{Ph}$ ), 75.0, 73.2 (C-3, C-4), 71.7, 71.6 ( $\text{OCH}_2\text{Ph}$ ), 64.8 (C-1), 57.6 (C-6). MS

(ESI):  $m/z$  489.2  $[M+K]^+$ , 473.3  $[M+Na]^+$ . Anal. calcd for  $C_{27}H_{30}O_6$  (450.5): C, 71.98; H, 6.71; found: C, 72.00; H, 6.72.

**(5*S*,8*R*,9*R*,10*S*)-8,9,10-Tris(benzyloxy)-2-benzylthio-3,6-dioxo-1-azaspiro[4.5]dec-1-ene (7a) and (5*R*,8*R*,9*R*,10*S*)-8,9,10-Tris(benzyloxy)-2-benzylthio-3,6-dioxo-1-azaspiro[4.5]dec-1-ene (7b)**

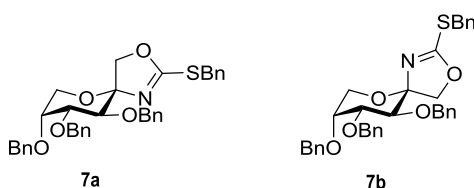

To a stirred solution of 3,4,5-tri-*O*-benzyl-D-fructopyranose (**3**) [2] (0.76 g, 1.69 mmol) in 50% aqueous 1,2-dimethoxyethane (20 mL) was added KSCN (0.41 g, 4.22 mmol) and conc. aqueous HCl solution (37%, 0.34 mL, 4.22 mmol). The resulting mixture was stirred at 90 °C for 72 h, evaporated in vacuo and re-dissolved in EtOAc (30 mL). The organic phase was washed with satd. aqueous  $NaHCO_3$  solution and  $H_2O$ , dried over  $Na_2SO_4$ , filtered and concentrated. The obtained colorless foam was dissolved in dry DMF (15 mL) and cooled to 0 °C. Benzyl bromide (0.30 mL, 2.53 mmol) and NaH (0.08 g, 2.02 mmol; 60% dispersion in mineral oil) were added and the resulting solution was stirred for 1 h at 0 °C and an additional 12 h at room temperature. The reaction mixture was quenched by addition of MeOH (5 mL) and evaporated to dryness. The residue was re-dissolved in EtOAc (30 mL), washed with  $H_2O$  and brine, dried over  $Na_2SO_4$ , filtered and concentrated. Chromatography of the residue (toluene:EtOAc, 35:1 +2.5%  $Et_3N$ ) afforded two fractions. Eluted first was **7b** (0.39 g, 40%) which was obtained as a colorless oil.  $[\alpha]_D^{20}$  -100.9 (c 1.00,  $CHCl_3$ ).  $R_f$  = 0.38 (toluene-EtOAc, 30:1 +2.5%  $Et_3N$ ).  $^1H$  NMR ( $CDCl_3$ ):  $\delta$  7.44-7.24 (m, 20H, phenyl-H), 5.06 (d,  $J$  = 11.9 Hz, 1H,  $OCH_2Ph$ ), 4.82-4.65 (m, 5H,  $OCH_2Ph$ ), 4.28 (q,  $J$  = 12.3 Hz, 2H,  $SCH_2Ph$ ),

4.20-4.15 (m, 3H, H-4, H-1a, H-1b), 4.04-4.00 (m, 2H, H-6a, H-3), 3.88 (bs, 1H, H-5), 3.81 (dd,  $J_{6b,6a} = 12.5$  Hz,  $J_{6b,5} = 1.9$  Hz, 1H, H-6b).  $^{13}\text{C}$  NMR ( $\text{CDCl}_3$ ):  $\delta$  169.5 (OCN), 138.6, 138.5, 138.4, 137.1, 129.0, 128.6, 128.5, 128.5, 128.4, 128.0, 127.8, 127.7, 127.7, 127.6, 127.5 (C-Ar), 102.6 (C-2), 80.4 (C-4), 77.3 (C-3), 76.5 (C-1), 75.0 ( $\text{OCH}_2\text{Ph}$ ), 73.8 (C-5), 72.2, 71.8 ( $\text{OCH}_2\text{Ph}$ ), 62.9 (C-6), 36.3 ( $\text{SCH}_2\text{Ph}$ ). MS (ESI):  $m/z$  620  $[\text{M}+\text{K}]^+$ , 604  $[\text{M}+\text{Na}]^+$ , 582  $[\text{M}+\text{H}]^+$ . HRMS (ESI-TOF):  $m/z$  calcd for  $\text{C}_{35}\text{H}_{36}\text{NO}_5\text{S}$   $[\text{M}+\text{H}]^+$ : 582.23087; found: 582.23116.

Eluted next was **7a** (0.45 g, 46%) which was obtained as colorless oil.  $[\alpha]_{\text{D}}^{20} +3.6$  (c 1.00,  $\text{CHCl}_3$ ).  $R_f = 0.32$  (toluene-EtOAc, 30:1 +2.5%  $\text{Et}_3\text{N}$ ).  $^1\text{H}$  NMR ( $\text{CDCl}_3$ ):  $\delta$  7.43-7.17 (m, 20H, phenyl-H), 4.81 (d,  $J = 12.6$  Hz, 1H,  $\text{OCH}_2\text{Ph}$ ), 4.69-4.64 (m, 4H,  $\text{OCH}_2\text{Ph}$ , H-1a, H-1b), 4.49 (dd,  $J = 9.8$  Hz,  $J = 8.7$  Hz, 2H,  $\text{OCH}_2\text{Ph}$ ), 4.39-4.23 (m, 3H,  $\text{SCH}_2\text{Ph}$ ,  $\text{OCH}_2\text{Ph}$ ), 4.19 (d,  $J_{3,4} = 9.3$  Hz, 1H, H-3), 4.10 (dd,  $J_{6a,6b} = 12.8$  Hz,  $J_{6a,5} = 3.6$  Hz, 1H, H-6a), 3.76-3.75 (m, 1H, H-5), 3.44 (dd,  $J_{4,3} = 9.3$  Hz,  $J_{4,5} = 3.1$  Hz, 1H, H-4), 3.34 (dd,  $J_{6b,6a} = 12.9$  Hz,  $J_{6b,5} = 1.4$  Hz, 1H, H-6b).  $^{13}\text{C}$  NMR ( $\text{CDCl}_3$ ):  $\delta$  170.7 (OCN), 138.5, 138.4, 138.2, 136.5, 129.3, 128.7, 128.6, 128.5, 128.5, 128.4, 128.1, 128.1, 127.8, 127.7, 127.7, 127.7, 127.6 (C-Ar), 103.6 (C-2), 79.0 (C-3), 78.5 (C-4), 75.3, 73.1 ( $\text{OCH}_2\text{Ph}$ ), 72.3 (C-5), 72.3 (C-1), 71.3 ( $\text{OCH}_2\text{Ph}$ ), 62.1 (C-6), 36.6 ( $\text{SCH}_2\text{Ph}$ ). HRMS (ESI-TOF):  $m/z$  calcd for  $\text{C}_{35}\text{H}_{36}\text{NO}_5\text{S}$   $[\text{M}+\text{H}]^+$ : 582.23087; found: 582.23130. Anal. Calcd for  $\text{C}_{35}\text{H}_{35}\text{NO}_5\text{S}$  (581.7): C, 72.26; H, 6.06; N, 2.41; S, 5.51; found.: C, 72.13; H, 6.13; N, 2.44; S, 5.32.

**(5*S*,8*R*,9*R*,10*R*)-8,9,10-Tris(benzyloxy)-2-benzylthio-3,6-dioxa-1-azaspiro[4.5]dec-1-ene (8a) and (5*R*,8*R*,9*R*,10*R*)-8,9,10-Tris(benzyloxy)-2-benzylthio-3,6-dioxa-1-azaspiro[4.5]dec-1-ene (8b)**

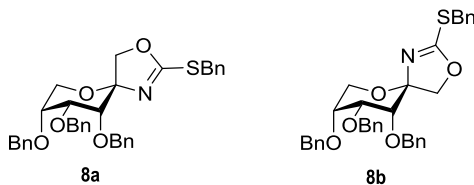

To a stirred solution of 3,4,5-tri-*O*-benzyl-D-psicopyranose (**4**, 1.60 g, 3.60 mmol) in 50% aqueous 1,2-dimethoxyethane (50 mL) was added KSCN (0.88 g, 9.10 mmol) and conc. aqueous HCl-solution (37%, 0.75 mL, 9.10 mmol). The resulting mixture was stirred at 90 °C for 72 h, evaporated in vacuo and re-dissolved in EtOAc (50 mL). The organic phase was washed with satd. aqueous NaHCO<sub>3</sub>-solution and H<sub>2</sub>O, dried over Na<sub>2</sub>SO<sub>4</sub>, filtered and concentrated. The obtained colorless foam was dissolved in dry DMF (30 mL) and cooled to 0 °C. Benzyl bromide (0.65 mL, 5.43 mmol) and NaH (0.17 g, 4.34 mmol; 60% dispersion in mineral oil) were added and the resulting solution was stirred for 1 h at 0 °C followed by room temperature for 12 h. The reaction mixture was quenched by the addition of MeOH (10 mL) and evaporated to dryness. The residue was re-dissolved in EtOAc (50 mL), washed with H<sub>2</sub>O and brine, dried over Na<sub>2</sub>SO<sub>4</sub>, filtered and concentrated. Chromatography of the residue (toluene:EtOAc, 35:1 +2.5% Et<sub>3</sub>N) afforded two fractions. Eluted first was **8a** (0.70 g, 33%) which was obtained as a colorless oil.  $[\alpha]_D^{20} +68.6$  (c 1.00, CHCl<sub>3</sub>).  $R_f = 0.53$  (toluene:EtOAc, 35:1 +2.5% Et<sub>3</sub>N). <sup>1</sup>H NMR (CDCl<sub>3</sub>): δ 7.53-7.22 (m, 20H, phenyl-H), 4.97 (q,  $J = 13.9$  Hz, 2H, OCH<sub>2</sub>Ph), 4.75-4.65 (m, 3H, OCH<sub>2</sub>Ph), 4.52-4.36 (m, 5H, OCH<sub>2</sub>Ph, SCH<sub>2</sub>Ph, H-6a, H-4), 4.13 (d,  $J_{1a,1b} = 9.0$  Hz, 1H, H-1a), 4.00 (d,  $J_{1b,1a} = 9.0$  Hz, 1H, H-1b), 3.70-3.66 (m, 1H, H-6b), 3.62-3.58 (m, 1H, H-5), 3.32 (d,  $J_{3,4} = 2.8$  Hz, 1H, H-3). <sup>13</sup>C NMR (CDCl<sub>3</sub>): δ 169.4 (OCN), 139.7, 138.3, 137.5, 129.2, 128.6, 128.6, 128.5, 128.1, 128.0, 127.9, 127.6, 127.5, 127.4, 127.1 (C-Ar), 100.4 (C-2), 77.9 (C-3), 76.9 (C-1), 75.5 (C-5), 73.4 (OCH<sub>2</sub>Ph), 72.0 (C-4), 71.2, 70.9 (OCH<sub>2</sub>Ph), 60.0 (C-6), 36.7 (SCH<sub>2</sub>Ph). MS (ESI):  $m/z$  620.1

[M+K]<sup>+</sup>, 604.2 [M+Na]<sup>+</sup>, 582.2 [M+H]<sup>+</sup>. HRMS (ESI-TOF): *m/z* calcd for C<sub>33</sub>H<sub>36</sub>NO<sub>5</sub>S [M+H]<sup>+</sup>: 582.23087; found: 582.23156.

Eluted next was **8b** (0.70 g, 33%) which was obtained as colorless oil. [ $\alpha$ ]<sub>D</sub><sup>20</sup> -2.5 (c 1.00, CHCl<sub>3</sub>). *R<sub>f</sub>* = 0.29 (toluene:EtOAc, 35:1 +2.5% Et<sub>3</sub>N). <sup>1</sup>H NMR (CDCl<sub>3</sub>):  $\delta$  7.30-7.15 (m, 20H, phenyl-H), 4.74-4.42 (m, 7H, OCH<sub>2</sub>Ph, H-1a, H-1b), 4.35-4.29 (m, 2H, OCH<sub>2</sub>Ph, SCH<sub>2</sub>Ph), 4.20 (d, *J* = 13.3 Hz, 1H, SCH<sub>2</sub>Ph), 4.02 (bs, 1H, H-4), 3.78-3.65 (m, 3H, H-6a, H-6b, H-3), 3.55-3.50 (m, 1H, H-5). <sup>13</sup>C NMR (CDCl<sub>3</sub>):  $\delta$  138.8, 138.4, 138.0, 136.2, 129.1, 128.8, 128.6, 128.5, 128.4, 128.0, 127.9, 127.8, 127.7, 127.7 (C-Ar), 101.0 (C-2), 78.3 (C-3), 77.4 (C-1), 75.3 (C-4), 74.5 (C-5), 74.3, 73.0, 71.5 (OCH<sub>2</sub>Ph), 60.6 (C-6), 36.6 (SCH<sub>2</sub>Ph). MS (ESI): *m/z* 620.1 [M+K]<sup>+</sup>, 604.2 [M+Na]<sup>+</sup>, 582.2 [M+H]<sup>+</sup>. Anal. calcd for C<sub>35</sub>H<sub>35</sub>NO<sub>5</sub>S (581.7): C, 72.26; H, 6.06; N, 2.41; found: C, 72.28; H, 6.11; N, 2.39.

### General procedure for the copper-assisted palladium-catalyzed cross coupling

To a stirred solution of 2-benzylsulfanyl-1,3-oxazolines **7** or **8** (1 equiv) in dry THF (15 mL) was added at room temperature in the following order: 2-pyridineboronic acid *N*-phenyldiethanolamine ester **11** (2.2 equiv), copper (I) 3-methylsalicylate (CuMeSal) (2.2 equiv) and Pd(PPh<sub>3</sub>)<sub>4</sub> (5 mol %). Stirring of the mixture was continued for 14 h at 70 °C. The mixture was cooled to room temperature, diluted with satd. aqueous Na<sub>2</sub>CO<sub>3</sub> solution (5 mL) and extracted with EtOAc (3 × 10 mL). The combined organic phases were washed with H<sub>2</sub>O and brine, dried over Na<sub>2</sub>SO<sub>4</sub>, filtered and concentrated. Chromatography of the residue gave the cross-coupled compounds **9** and **10**.



**(5*S*,8*R*,9*R*,10*S*)-8,9,10-Tris(benzyloxy)-2-(pyridin-2-yl)-3,6-dioxo-1-azaspiro[4.5]dec-1-ene (9a)**

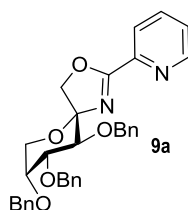

Treatment of **7a** (100 mg, 0.17 mmol) with 2-pyridineboronic acid *N*-phenyldiethanolamine ester **11** (101 mg, 0.38 mmol), CuMeSal (81 mg, 0.38 mmol) and Pd(PPh<sub>3</sub>)<sub>4</sub> (10 mg, 0.01 mmol, 5 mol %) according to the general procedure followed by column chromatography (toluene:EtOAc, 1:1 +2.5% Et<sub>3</sub>N) and recrystallization from *n*-hexane/EtOAc gave **9a** (80 mg, 87%) as colorless needles. Spectroscopic data were in accordance with previously published data [4].

**(5*R*,8*R*,9*R*,10*S*)-8,9,10-Tris(benzyloxy)-2-(pyridin-2-yl)-3,6-dioxo-1-azaspiro[4.5]dec-1-ene (9b)**

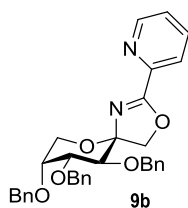

Treatment of **7b** (140 mg, 0.24 mmol) with 2-pyridineboronic acid *N*-phenyldiethanolamine ester **11** (142 mg, 0.53 mmol), CuMeSal (114 mg, 0.53 mmol) and Pd(PPh<sub>3</sub>)<sub>4</sub> (14 mg, 0.01 mmol, 5 mol%) according to the general procedure followed by column chromatography (toluene:EtOAc, 2:1 +2.5% Et<sub>3</sub>N) and recrystallization from *n*-hexane/EtOAc gave **9b** (90 mg, 70%) as colorless needles. Spectroscopic data were in accordance with previously published data [4].

**(5*S*,8*R*,9*R*,10*R*)-8,9,10-Tris(benzyloxy)-2-(pyridin-2-yl)-3,6-dioxo-1-azaspiro[4.5]dec-1-ene (10a)**

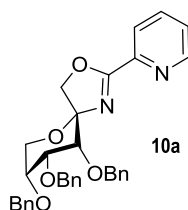

Treatment of **8a** (0.54 g, 0.93 mmol) with 2-pyridineboronic acid *N*-phenyldiethanolamine ester **11** (0.55 g, 2.04 mmol), CuMeSal (0.44 g, 2.04 mmol) and Pd(PPh<sub>3</sub>)<sub>4</sub> (0.05 g, 0.05 mmol) according to the general procedure followed by column chromatography (toluene:EtOAc, 35:1 +2.5% Et<sub>3</sub>N) afforded **10a** (0.16 g, 32%) as a pale yellow oil.  $[\alpha]_D^{20} +82.7$  (c 1.00, CHCl<sub>3</sub>).  $R_f = 0.20$  (toluene:EtOAc, 35:1 +2.5% Et<sub>3</sub>N). <sup>1</sup>H NMR (CDCl<sub>3</sub>):  $\delta$  8.63 (d,  $J = 4.2$  Hz, 1H, pyridine-H), 8.20 (d,  $J = 7.9$  Hz, 1H, pyridine-H), 7.66 (td,  $J = 3.9$  Hz,  $J = 1.7$  Hz, 1H, pyridine-H), 7.47 (d,  $J = 6.8$  Hz, 1H, pyridine-H), 7.33-7.15 (m, 15H, phenyl-H), 4.88 (q,  $J = 13.3$  Hz, 2H, OCH<sub>2</sub>Ph), 4.59-4.45 (m, 4H, OCH<sub>2</sub>Ph, H-6a), 4.31-4.29 (m, 2H, OCH<sub>2</sub>Ph, H-4), 4.14 (d,  $J = 9.5$  Hz, 1H, H-1a), 4.03 (d,  $J = 9.5$  Hz, 1H, H-1b), 3.61 (dd,  $J_{6b,6a} = 10.5$  Hz,  $J_{6b,5} = 4.1$  Hz, 1H, H-6b), 3.55-3.50 (m, 1H, H-5), 3.26 (d,  $J_{3,4} = 2.7$  Hz, 1H, H-3). <sup>13</sup>C NMR (CDCl<sub>3</sub>):  $\delta$  165.2 (OCN), 149.5, 147.1, 139.8, 138.3, 137.2, 136.5, 128.6, 128.5, 128.3, 128.1, 128.1, 127.8, 127.5, 127.0, 125.8, 125.4 (C-Ar), 101.3 (C-2), 78.0 (C-3), 75.6 (C-1), 75.4 (C-5), 73.5 (OCH<sub>2</sub>Ph), 72.2 (C-4), 71.2, 70.9 (OCH<sub>2</sub>Ph), 60.2 (C-6). MS (ESI):  $m/z$  559.2 [M+Na]<sup>+</sup>, 537.2 [M+H]<sup>+</sup>. HRMS (ESI-TOF):  $m/z$  calcd for C<sub>33</sub>H<sub>33</sub>N<sub>2</sub>O<sub>5</sub> [M+H]<sup>+</sup>: 537.23840; found: 537.23863.

**(5*R*,8*R*,9*R*,10*R*)-8,9,10-Tris(benzyloxy)-2-(pyridin-2-yl)-3,6-dioxo-1-azaspiro[4.5]dec-1-ene (10b)**

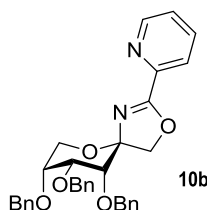

Treatment of **8b** (0.22 g, 0.38 mmol) with 2-pyridineboronic acid *N*-phenyldiethanolamine ester **11** (0.22 g, 0.83 mmol), CuMeSal (0.18 g, 0.83 mmol) and Pd(PPh<sub>3</sub>)<sub>4</sub> (0.02 g, 0.02 mmol) according to the general procedure followed by column chromatography (toluene:EtOAc, 2:1 +2.5% Et<sub>3</sub>N) gave **10b** (0.13 g, 64%) as a colorless oil.  $[\alpha]_D^{20}$  -73.6 (c 1.00, CHCl<sub>3</sub>).  $R_f$  = 0.31 (toluene:EtOAc, 2:1 +2.5% Et<sub>3</sub>N). <sup>1</sup>H NMR (CDCl<sub>3</sub>): δ 8.75 (ddd,  $J$  = 4.7 Hz,  $J$  = 1.5 Hz,  $J$  = 0.8 Hz, 1H, pyridine-H), 8.18 (d,  $J$  = 7.9 Hz, 1H, pyridine-H), 7.80 (td,  $J$  = 3.9 Hz,  $J$  = 1.7 Hz, 1H, pyridine-H), 7.45-7.25 (m, 16H, pyridine-H, phenyl-H), 4.88-4.54 (m, 8H, OCH<sub>2</sub>Ph, H-1a, H-1b), 4.20 (bs, 1H, H-4), 3.96-3.84 (m, 3H, H-3, H-6a, H-6b), 3.67 (ddd,  $J$  = 9.7 Hz,  $J$  = 4.8 Hz,  $J$  = 2.4 Hz, 1H, H-5). <sup>13</sup>C NMR (CDCl<sub>3</sub>): δ 166.8 (OCN), 149.9, 138.9 138.4, 138.1, 136.8, 128.6, 128.4, 127.9, 127.8, 127.7, 127.6, 126.2, 124.8 (C-Ar), 102.2 (C-2), 78.5 (C-3), 75.3 (C-4), 74.7 (C-5), 74.2, 72.8, 71.6 (OCH<sub>2</sub>Ph, C-1), 60.3 (C-6). HRMS (ESI-TOF):  $m/z$  calcd for C<sub>33</sub>H<sub>33</sub>N<sub>2</sub>O<sub>5</sub> [M+H]<sup>+</sup>: 537.23840; found: 537.23881.

**General procedure for the addition of dimethyl malonate to 1,3-diphenylallyl acetate**

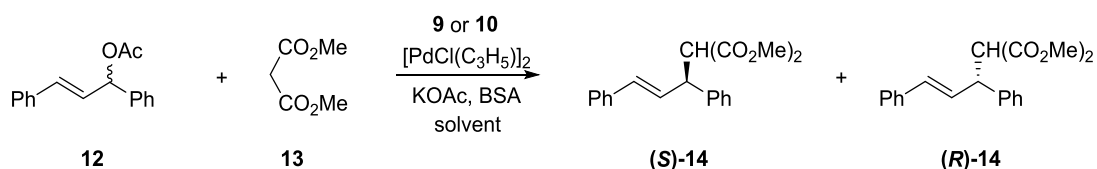

A solution of ligand **9** or **10** (6 mg, 0.011 mmol, 11 mol % with respect to acetate **12**) and [PdCl(C<sub>3</sub>H<sub>5</sub>)<sub>2</sub>] (1.8 mg, 0.005 mmol, 5 mol %) in dry toluene (1 mL) was stirred for 30 min at room temperature. Racemic (*E*)-1,3-diphenylallyl acetate (**12**, 25 mg, 0.1 mmol), dimethyl

malonate (**13**, 34  $\mu\text{L}$ , 0.3 mmol), *N,O*-bis(trimethylsilyl)acetamide (BSA) (73  $\mu\text{L}$ , 0.3 mmol) and KOAc (0.5 mg, 0.005 mmol) were added and stirring was continued for 12 h at room temperature. The reaction mixture was diluted with Et<sub>2</sub>O (3 mL) and 5% aqueous NH<sub>4</sub>Cl solution (2 mL) and the aqueous layer was extracted with Et<sub>2</sub>O (3  $\times$  5 mL). The combined organic phases were washed with water and brine, dried over Na<sub>2</sub>SO<sub>4</sub>, filtered and concentrated. Chromatography of the residue (PE:EtOAc, 6:1) gave **14** as a colorless oil. Spectroscopic data are in correspondence with literature [5].

## References

1. Kaji, E.; Kurimoto, E.; Saiga, R.; Matsuura, A.; Harada, K.; Nishino, T. *Heterocycles* **2005**, *66*, 453-468.
2. Campbell, M. M.; Heffernan, G. D.; Lewis, T. *Carbohydr. Res.* **1994**, *251*, 243-250.
3. Nakajima, N.; Matsumoto, M.; Kirihaara, M.; Hashimoto, M.; Katoh, T.; Terashima, S. *Tetrahedron* **1996**, *52*, 1177-1194.
4. Kraft, J.; Ziegler, T. *Carbohydr. Res.* **2015**, *411*, 56-63.
5. Leutenegger, U.; Umbricht, G.; Fahrni, C.; von Matt, P.; Pfaltz, A. *Tetrahedron* **1992**, *48*, 2143-2156.

# NMR spectra

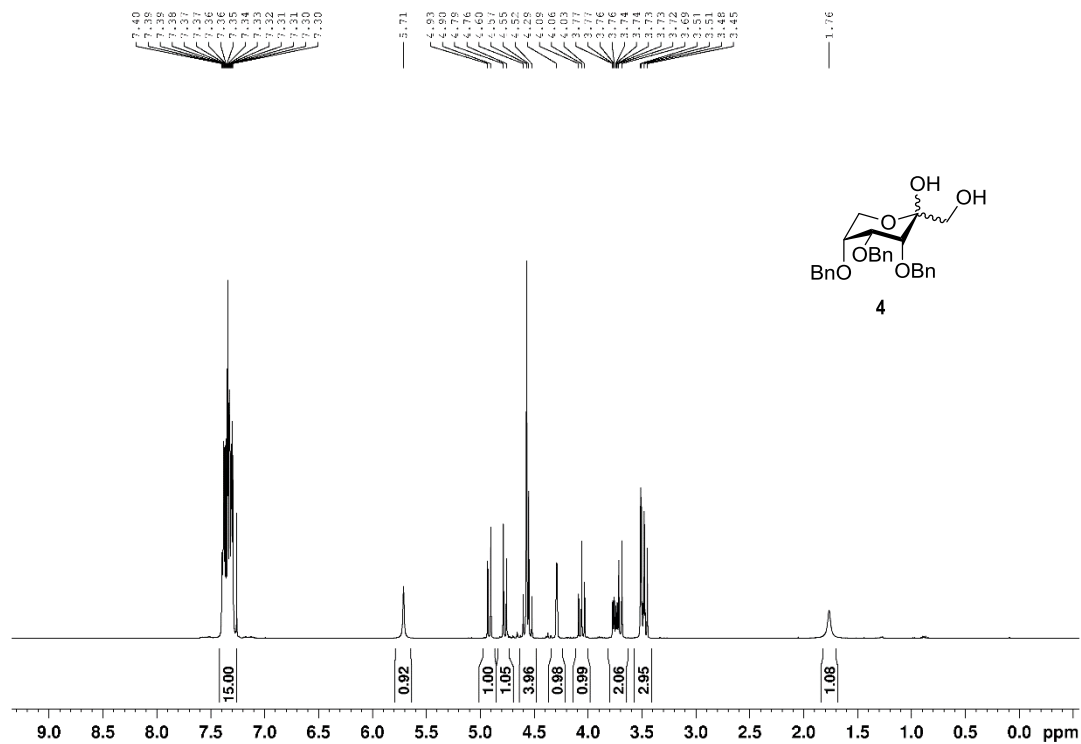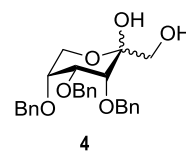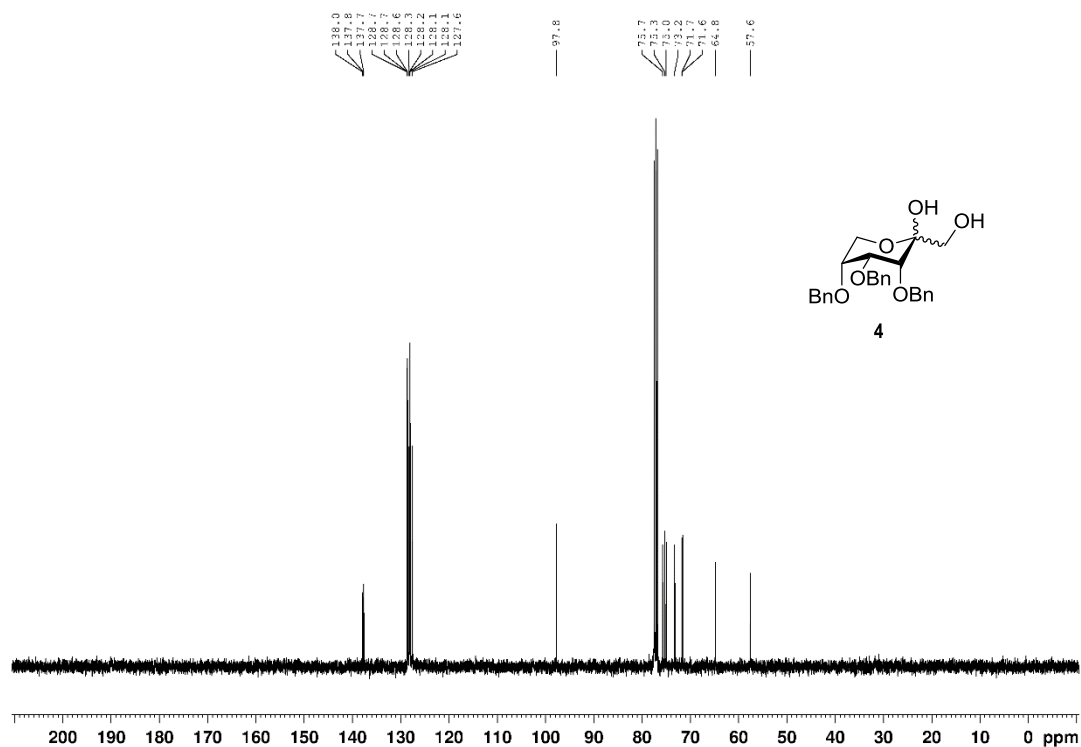

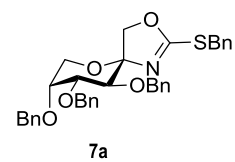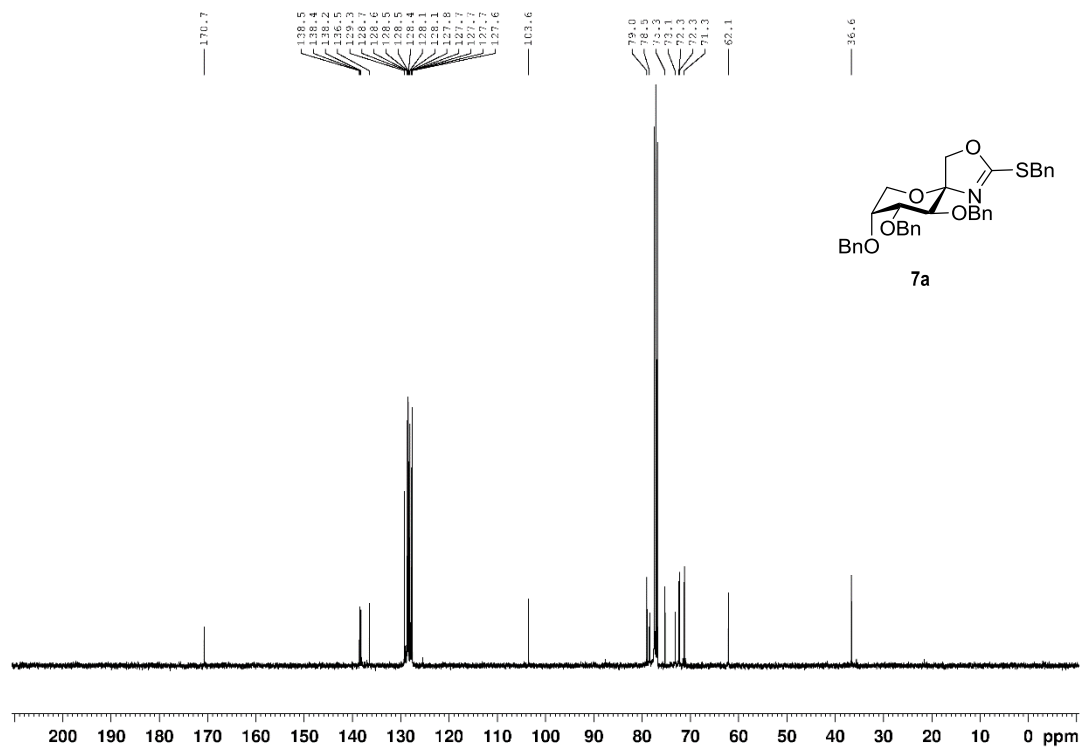

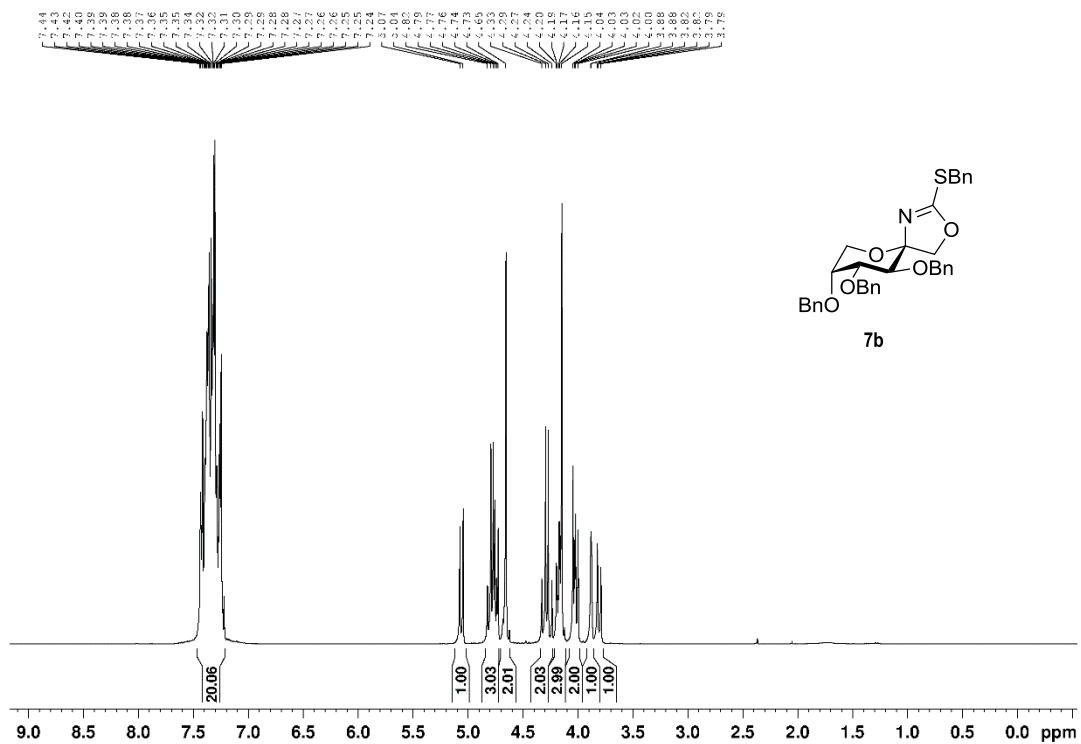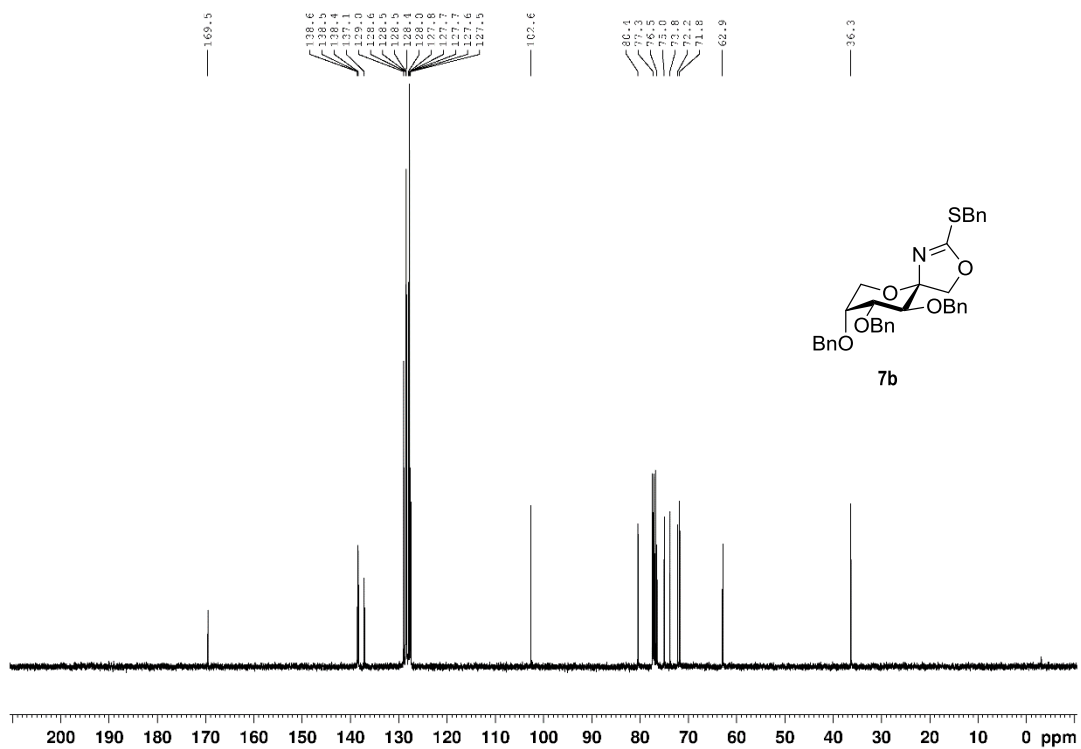





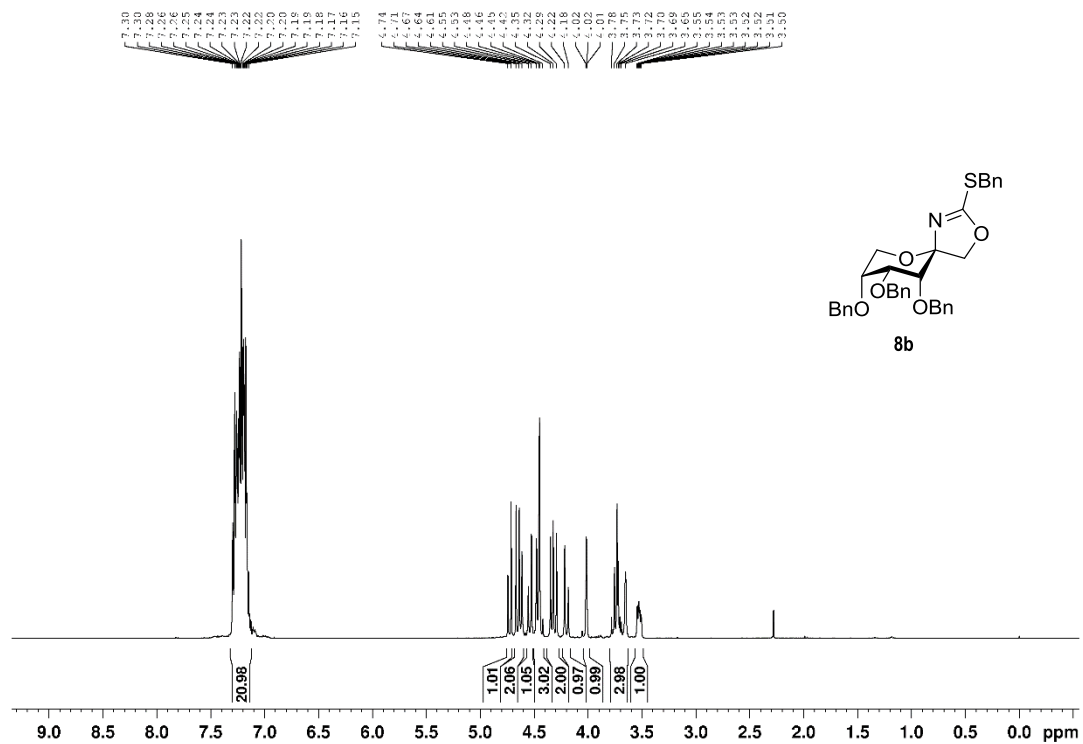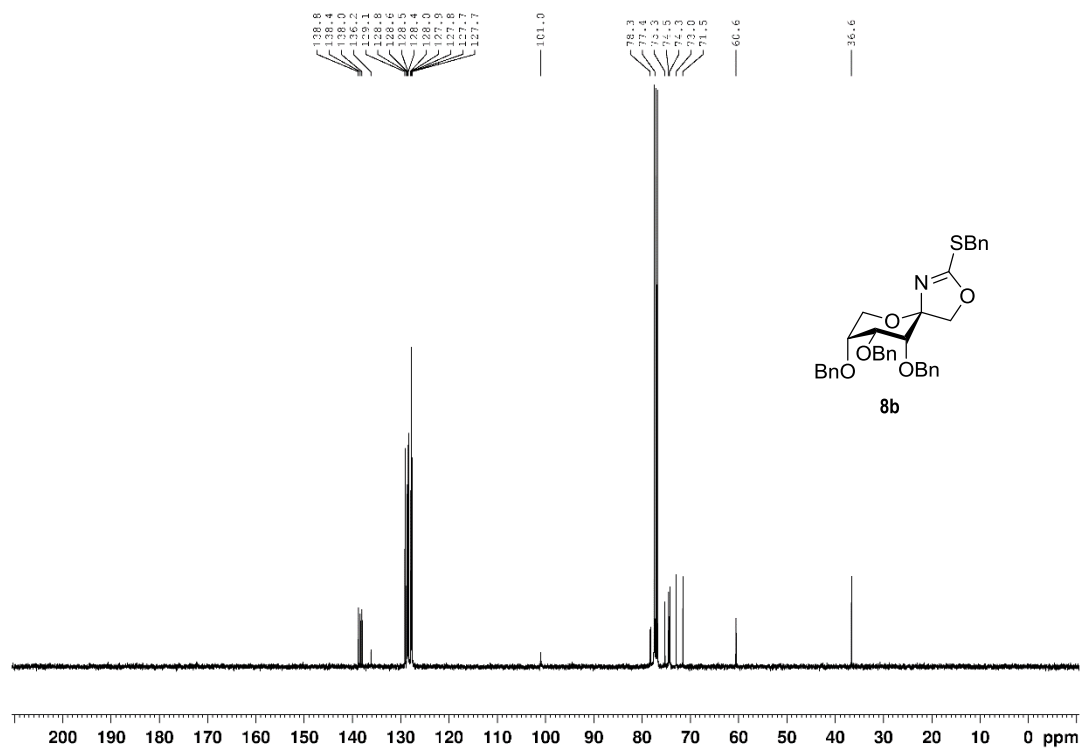

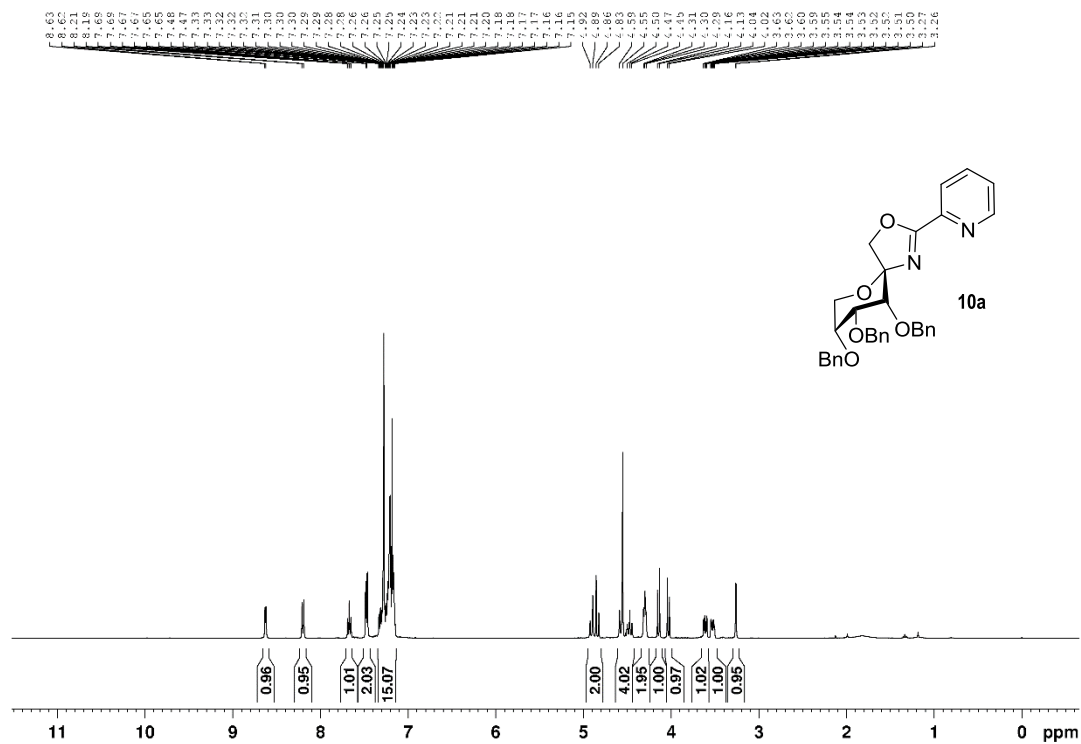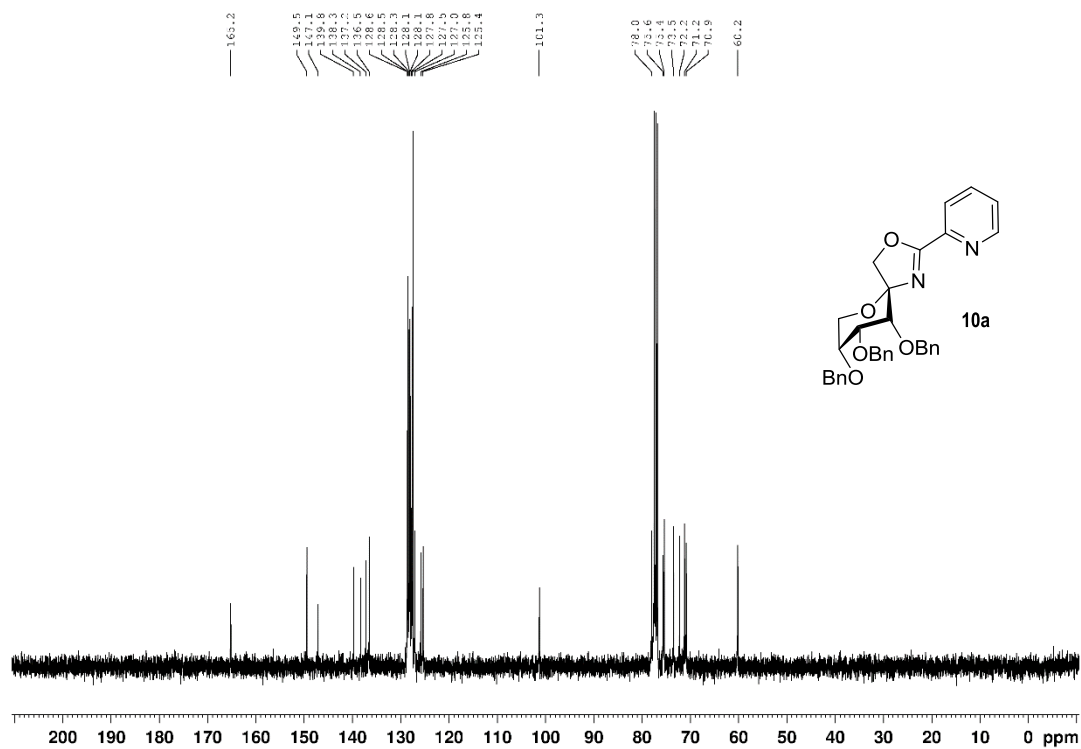

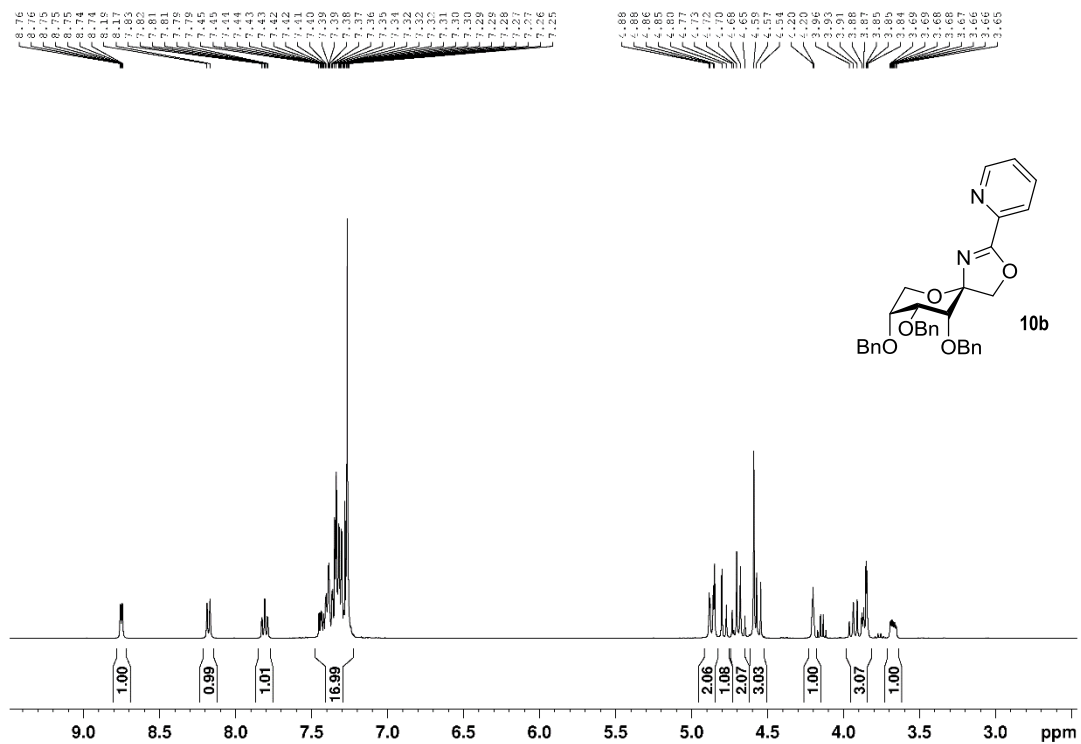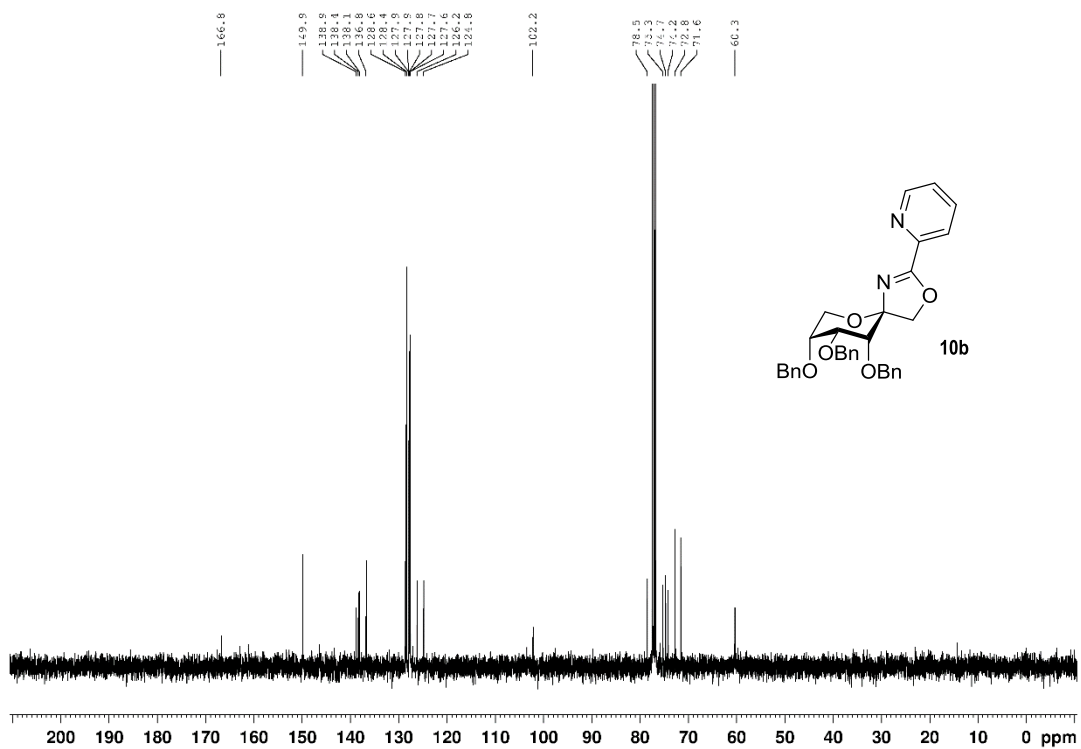

Supplement: Additional file 1 [file 1860-5397-12-18-S1.pdf]
